# Supplementary material for: Perceived importance and determinants of telehealth integration in clinical training for chest physicians: A cross-sectional survey-based study
Source: Research Square preprint supplement (doi:10.21203/rs.3.rs-7647759/v1), 2025-11-11
Supplement: Supplementary file 1 [file 8d61b0bae1d11f38e0657bee.docx]

Appendix I: Telehealth Integration in Clinical Training Questionnaire

The research team extends its best wishes and invites you to complete this questionnaire to evaluate the physician's perceived Importance of Integrating Telehealth in Clinical Training. Your participation does not require you to reveal any personal information. Any information you provide will be solely used for research purposes.

Filling out this questionnaire will take only a few minutes, and your participation is entirely voluntary; you are completely free to withdraw at any time. Your participation is greatly appreciated.

**1.Demographics:**

1. Name

2. Age (years)

3. Gender
- Male
- Female

4. Years of experience

5. Professional rank
- Resident
- Diploma
- Master
- Fellowship
- PhD

6. Type of healthcare facility
- Hospital
- Clinic
- Private Practice

7. How frequently do you use telehealth for patient consultations?
- Daily
- Weekly
- Monthly
- Rarely

**2. Satisfaction with Telehealth Services:**

8. Please indicate your level of agreement with the following statements using a scale from 1 to 5 (where; 1= very dissatisfied, 2 = dissatisfied, 3= neutral, 4= satisfied, 5 = very satisfied).

| No. | Statement | 1 | 2 | 3 | 4 | 5 |
| --- | --- | --- | --- | --- | --- | --- |
| a. | I am satisfied with the **acceptability** of telehealth services. | ☐ | ☐ | ☐ | ☐ | ☐ |
| b. | I am satisfied with the **quality of video and audio** during consultations. | ☐ | ☐ | ☐ | ☐ | ☐ |
| c. | I am satisfied with the **effectiveness of telehealth in patient care**. | ☐ | ☐ | ☐ | ☐ | ☐ |
| d. | I am satisfied with the **ease of use** of telehealth platforms. | ☐ | ☐ | ☐ | ☐ | ☐ |
| e. | I am satisfied with the **security and privacy** of telehealth consultations. | ☐ | ☐ | ☐ | ☐ | ☐ |
| f. | I am satisfied with the **timeliness of telehealth appointments**. | ☐ | ☐ | ☐ | ☐ | ☐ |
| g. | I am satisfied with the **technical support** provided for telehealth services. | ☐ | ☐ | ☐ | ☐ | ☐ |
| h. | Overall, I am satisfied with the **telehealth services** I use. | ☐ | ☐ | ☐ | ☐ | ☐ |

**3. Importance of Telehealth Integration into Clinical Training**

9. Please indicate your level of agreement with the following statements using a scale from 1 to 5 (where; 1= disagree, 2 = partially disagree, 3= neutral, 4= partially agree, 5 = agree).

| Statement | 1 | 2 | 3 | 4 | 5 |
| --- | --- | --- | --- | --- | --- |
| I believe it is important to integrate telehealth training into clinical education | ☐ | ☐ | ☐ | ☐ | ☐ |

**4. Training and Education Needs**:

10. Please rate your confidence level using a scale from 1 to 5
(where, 1 = Not confident at all, 2 = Slightly confident, 3 = Moderately confident, 4 = Confident, 5 = Very confident

| Statement | 1 | 2 | 3 | 4 | 5 |
| --- | --- | --- | --- | --- | --- |
| I feel confident in my ability to use telehealth effectively in my clinical practice. | ☐ | ☐ | ☐ | ☐ | ☐ |

**5. Integration with Electronic Health Records (EHR):**

11. Please rate the extent of integration using a scale from 1 to 5
(where, 1 = Not integrated at all, 2 = Slightly integrated, 3 = Moderately integrated, 4 = Well integrated, 5 = Fully integrated)

| Statement | 1 | 2 | 3 | 4 | 5 |
| --- | --- | --- | --- | --- | --- |
| To what extent is telehealth integrated with your EHR system? | ☐ | ☐ | ☐ | ☐ | ☐ |

**6.The security and confidentiality of telehealth**

12. Please rate the effectiveness of your measures on a scale from 1 to 5

(where, 1 = Not effective, 2 = Slightly effective, 3 = Moderately effective, 4 = Effective, 5 = Extremely effective)

| Statement | 1 | 2 | 3 | 4 | 5 |
| --- | --- | --- | --- | --- | --- |
| I ensure the security and confidentiality of patient data during telehealth consultations. | ☐ | ☐ | ☐ | ☐ | ☐ |

We sincerely appreciate your time and thoughtful participation in this study. Your responses will remain strictly confidential and will be analyzed only in aggregate form.
By submitting this questionnaire, you acknowledge that you have read the study information and voluntarily agree to participate.
